# Supplementary material for: Mechanism of Li intercalation/deintercalation into/from the surface of LiCoO2
Source: Royal Society of Chemistry journal article supplement (doi:10.1039/c5cp02246k), 2015-01-01
Supplement: c5cp02246k1.pdf [file c5cp02246k1.pdf]

## Electronic Supplementary Information for PCCP article

### Mechanism of Li intercalation at the surface of $\text{LiCoO}_2$

July 9, 2015

Ashkan Moradabadi and Payam Kaghazchi\*

Basis sets details (gaussian exponents and their contraction coefficients) for Li, Co, and O atoms:

#### Li

number of radial functions

5

angular momentum, number of alphas

0 3

alphas - s -  $3s/2/3s392$  Eopt + reopt(c2,c1)

0.06595300d+00 0.69066600d+00 1.38140000d+00

wave function coefficients

0.08945700d+00 -0.22707000d+00 0.09077400d+00

angular momentum, number of alphas

0 1

alphas - s - second zeta s polarization

0.06595300d+00

wave function coefficients

1.00000000d+00

angular momentum, number of alphas

1 3

alphas - p - angular polarization Eopt (a,c)

0.07500000d+00 0.28000000d+00 1.22000000d+00

wave function coefficients

0.28870000d+00 0.44870000d+00 1.00000000d+00

angular momentum, number of alphas

1 1

alphas - p - angular polarization Eopt

0.07500000d+00

wave function coefficients

1.00000000d+00

angular momentum, number of alphas

2 1

alphas - p - angular polarization Eopt  
0.16000000d+00  
wave function coefficients  
1.00000000d+00  
shell occupancies for lithium Li: s(1.0)  
1.00000000 0.00000000 0.00000000 0.00000000 0.00000000 0.00000000

## Co

number of radial functions  
5  
angular momentum, number of alphas  
2 5  
alphas - d - 5d/2/5d454 Eopt + reoptc2,c1  
0.20180500d+00 0.55441400d+00 1.41387600d+00 3.82273500d+00  
10.94516300d+00  
wave function coefficients  
0.03670400d+00 0.26293800d+00 1.77797300d+00 12.96827300d+00  
-1.31161300d+00  
angular momentum, number of alphas  
0 4  
alphas - s - 4s/2/4s392 Eopt(a2,a1,c2,c1)  
0.07400000d+00 0.25000000d+00 0.81233900d+00 1.62470000d+00  
wave function coefficients  
0.13795000d+00 0.30040000d+00 -1.05673000d+00 0.39376000d+00  
angular momentum, number of alphas  
0 1  
alphas - s - second zeta s polarization  
0.07400000d+00  
wave function coefficients  
1.00000000d+00  
angular momentum, number of alphas  
1 2  
alphas - p - angular polarization Eopt  
0.12000000d+00 0.68000000d+00  
wave function coefficients  
1.00000000d+00 -0.66500000d+00  
angular momentum, number of alphas  
2 1  
alphas - d - second zeta d polarization  
0.20180500d+00  
wave function coefficients  
1.00000000d+00  
shell occupancies for cobalt, Co: d(7.40)s(s1.60)  
7.40000000 1.60000000 0.00000000 0.00000000 0.00000000 0.00000000

## O

number of radial functions  
5  
angular momentum, number of alphas

0 5  
 alphas - s - 5s/2/5s284 Eopt(flat) + check (c1)  
 0.24022700d+00 0.68334800d+00 1.98182200d+00 3.96390000d+00  
 7.92780000d+00  
 wave function coefficients  
 0.33303400d+00 1.10004600d+00 1.16492600d+00 -1.95149900d+00  
 0.64475500d+00  
 angular momentum, number of alphas  
 1 4  
 alphas - p - 4p/2/4p563 Eopt + reopt(c1)  
 0.12928900d+00 0.40218500d+00 1.18213300d+00 3.84037500d+00  
 wave function coefficients  
 0.05931000d+00 0.37536900d+00 1.45605400d+00 3.86770800d+00  
 angular momentum, number of alphas  
 0 1  
 alphas - s - second zeta s polarization  
 0.24022700d+00  
 wave function coefficients  
 1.00000000d+00  
 angular momentum, number of alphas  
 1 1  
 alphas - p - second zeta p polarization  
 0.12928900d+00  
 wave function coefficients  
 1.00000000d+00  
 angular momentum, number of alphas  
 2 2  
 alphas  
 0.25000000d+00 1.20000000d+00  
 wave function coefficients  
 0.11720000d+00 1.00000000d+00  
 shell occupancies for oxygen, O s(2.0)p(4.5)p'(-0.5), -0.5 pseudoion (H2O)  
 2.00000000 4.50000000 0.00000000 -0.50000000 0.00000000
